# Supplementary material
Source: Springer Nature journal article supplement (https://www.springermedizin.de/resource/supplementary/12947_2008_194_MOESM4_ESM.pdf/9556426)

Coronary Flow Velocity Reserve

5,0  
4,0  
3,0  
2,0  
1,0  
0,0

Normal MPI

Abnormal MPI

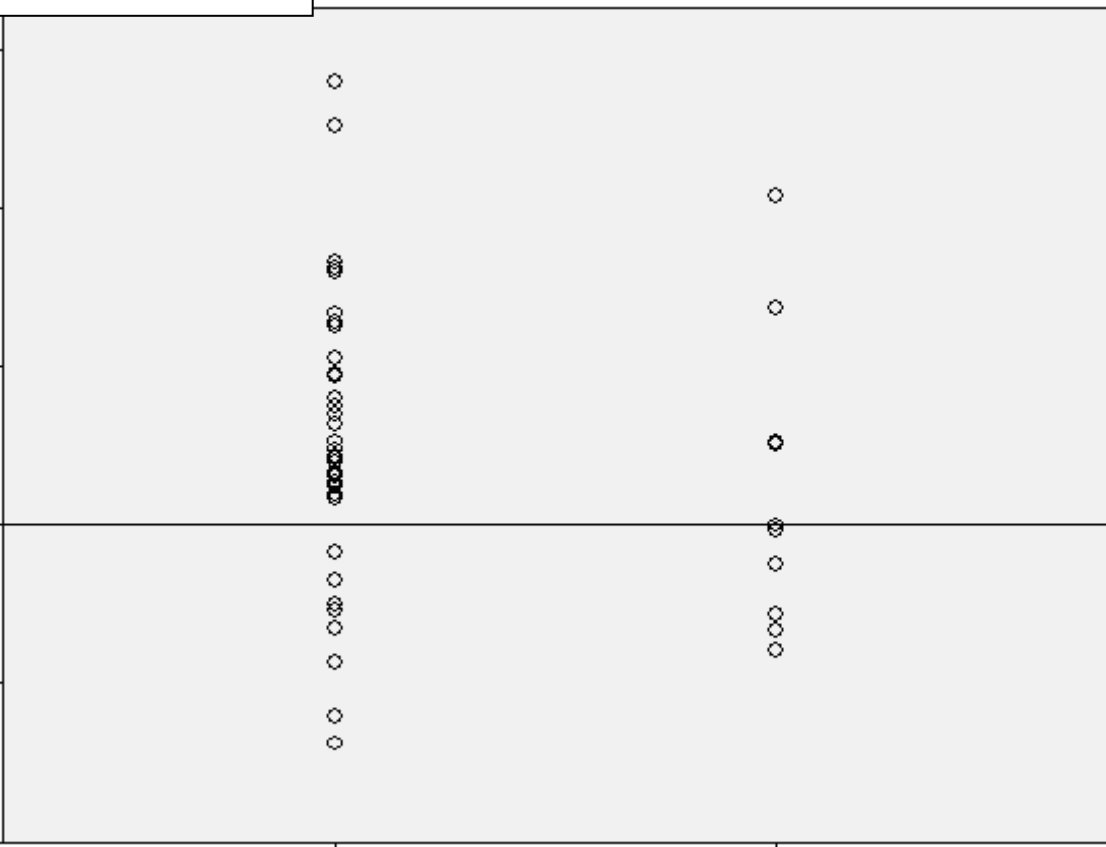

Supplement: MOESM4 [file 9556426]
